# Supplementary material for: Dietary Carbohydrates and Insulin Resistance in Adolescents from Marginalized Areas of Chiapas, México
Source: Nutrients. 2019 Dec 16;11(12):3066. doi: 10.3390/nu11123066 (PMC6950049; doi:10.3390/nu11123066)
Supplement: Supplementary file 1 [file nutrients-11-03066-s001.pdf]

**Table S1.** Measures of quality and Hosmer–Lemeshow tests for logistic regression models of associations between categories of carbohydrate intake variables and insulin resistance (HOMA-IR >3.16) in adolescents from Chiapas, Mexico.

| Factor variables                  | Insulin resistance (HOMA-IR > 3.16) |                      |                      |                      |
|-----------------------------------|-------------------------------------|----------------------|----------------------|----------------------|
|                                   | OR (95% CI)                         | OR (95% CI)          | OR (95% CI)          | OR (95% CI)          |
| Total Carbohydrates <sup>ab</sup> | Model 1                             | Model 2 <sup>c</sup> | Model 3 <sup>d</sup> | Model 4 <sup>e</sup> |
| <b>Males</b>                      |                                     |                      |                      |                      |
| Sensitivity                       | 47.37%                              | 47.37%               | 36.84%               | 42.11%               |
| Specificity                       | 68.48%                              | 77.17%               | 81.52%               | 79.35%               |
| Hosmer–Lemeshow test p-value      | NA*                                 | 0.296                | 0.296                | 0.153                |
| <b>Females</b>                    |                                     |                      |                      |                      |
| Sensitivity                       | 62.96%                              | 88.89%               | 85.19%               | 81.48%               |
| Specificity                       | 65.82%                              | 56.96%               | 56.96%               | 68.35%               |
| Hosmer–Lemeshow test p-value      | NA*                                 | 0.051                | 0.090                | 0.376                |
| Dietary Fiber <sup>a</sup>        | Model 1                             | Model 2 <sup>f</sup> | Model 3 <sup>g</sup> | Model 4 <sup>h</sup> |
| Sensitivity                       | 54.35%                              | 71.74%               | 71.74%               | 67.39%               |
| Specificity                       | 71.93%                              | 63.16%               | 64.91%               | 66.67%               |
| Hosmer–Lemeshow test p-value      | NA*                                 | 0.402                | 0.502                | 0.112                |
| Total Sugars <sup>a</sup>         | Model 1                             | Model 2 <sup>f</sup> | Model 3 <sup>g</sup> | Model 4 <sup>i</sup> |
| Sensitivity                       | 78.26%                              | 67.39%               | 60.87%               | 69.57%               |
| Specificity                       | 36.26%                              | 61.40%               | 63.16%               | 63.74%               |
| Hosmer–Lemeshow test p-value      | NA*                                 | 0.295                | 0.262                | 0.168                |
| Dietary GI                        | Model 1                             | Model 2 <sup>f</sup> | Model 3 <sup>j</sup> | Model 4 <sup>k</sup> |
| Sensitivity                       | 43.48%                              | 60.87%               | 71.74%               | 67.39%               |
| Specificity                       | 69.59%                              | 56.14%               | 53.80%               | 63.16%               |
| Hosmer–Lemeshow test p-value      | NA*                                 | 0.274                | 0.294                | 0.113                |
| Dietary GL <sup>a</sup>           | Model 1                             | Model 2 <sup>f</sup> | Model 3 <sup>j</sup> | Model 4 <sup>l</sup> |
| Sensitivity                       | 41.30%                              | 63.04%               | 71.74%               | 69.57%               |
| Specificity                       | 68.42%                              | 56.73%               | 54.39%               | 60.82%               |
| Hosmer–Lemeshow test p-value      | NA*                                 | 0.238                | 0.183                | 0.102                |

<sup>a</sup> Energy-adjusted using the residuals method. <sup>b</sup> Interaction term  $p < 0.05$ . <sup>c</sup> Adjusted for age (years). <sup>d</sup> Adjusted for age (years) and BF% (normal/high). <sup>e</sup> Adjusted for age (years), BF% (normal/high), energy-adjusted dietary fiber intake (g/day) and energy-adjusted MUFAs intake (g/day). <sup>f</sup> Adjusted for sex (males/females) and age (years). <sup>g</sup> Adjusted for sex (males/females), age (years) and BF% (normal/high). <sup>h</sup> Adjusted for sex (males/females), age (years), BF% (normal/high), energy-adjusted MUFAs intake (g/day) and total energy intake (kcal/day). <sup>i</sup> Adjusted for sex (males/females), age (years), BF% (normal/high) and energy-adjusted MUFAs intake (g/day). <sup>j</sup> Adjusted for sex (males/females), age (years), geographic area (rural/urban) and BF% (normal/high). <sup>k</sup> Adjusted for sex (males/females), age (years), geographic area (rural/urban), BF% (normal/high), energy-adjusted MUFAs intake (g/day) and total energy intake (kcal/day). <sup>l</sup> Adjusted for sex (males/females), age (years), geographic area (rural/urban), BF% (normal/high) and energy-adjusted MUFAs intake (g/day). HOMA-IR, homeostasis model assessment of insulin resistance; T, tertiles; BF%, body fat percentage; MUFAs, monounsaturated fatty acids; GI, glycemic index; GL, glycemic load.

**Table S2.** Measures of quality and Hosmer–Lemeshow tests for logistic regression models of associations between insulin resistance (HOMA-IR >2.97) and categories of carbohydrate intake variables in adolescents from Chiapas, Mexico.

| Factor variables                  | Insulin resistance (HOMA-IR > 2.97) |                      |                      |                      |
|-----------------------------------|-------------------------------------|----------------------|----------------------|----------------------|
|                                   | OR (95% CI)                         | OR (95% CI)          | OR (95% CI)          | OR (95% CI)          |
| Total Carbohydrates <sup>ab</sup> | Model 1                             | Model 2 <sup>b</sup> | Model 3 <sup>c</sup> | Model 4 <sup>d</sup> |
| Sensitivity                       | 74.00%                              | 60.00%               | 64.00%               | 68.00%               |
| Specificity                       | 35.33%                              | 55.09%               | 58.08%               | 62.28%               |
| Hosmer–Lemeshow test p-value      | NA*                                 | 0.215                | 0.223                | 0.109                |
| Dietary Fiber <sup>a</sup>        | Model 1                             | Model 2 <sup>b</sup> | Model 3 <sup>c</sup> | Model 4 <sup>e</sup> |
| Sensitivity                       | 84.00%                              | 70.00%               | 74.00%               | 72.00%               |
| Specificity                       | 38.32%                              | 59.28%               | 58.08%               | 60.48%               |
| Hosmer–Lemeshow test p-value      | NA*                                 | 0.121                | 0.168                | 0.197                |
| Total Sugars <sup>a</sup>         | Model 1                             | Model 2 <sup>b</sup> | Model 3 <sup>c</sup> | Model 4 <sup>f</sup> |
| Sensitivity                       | 80.00%                              | 62.00%               | 66.00%               | 74.00%               |
| Specificity                       | 37.13%                              | 61.08%               | 61.08%               | 60.48%               |
| Hosmer–Lemeshow test p-value      | NA*                                 | 0.350                | 0.320                | 0.329                |
| Dietary GI                        | Model 1                             | Model 2 <sup>b</sup> | Model 3 <sup>c</sup> | Model 4 <sup>g</sup> |
| Sensitivity                       | 78.00%                              | 60.00%               | 64.00%               | 66.00%               |
| Specificity                       | 37.13%                              | 55.69%               | 59.28%               | 60.48%               |
| Hosmer–Lemeshow test p-value      | NA*                                 | 0.291                | 0.336                | 0.200                |
| Dietary GL <sup>a</sup>           | Model 1                             | Model 2 <sup>b</sup> | Model 3 <sup>h</sup> | Model 4 <sup>i</sup> |
| Sensitivity                       | 72.00%                              | 64.00%               | 60.00%               | 68.00%               |
| Specificity                       | 34.73%                              | 59.88%               | 62.87%               | 65.87%               |
| Hosmer–Lemeshow test p-value      | NA*                                 | 0.269                | 0.306                | 0.166                |

<sup>a</sup> Energy-adjusted using the residuals method. <sup>b</sup> Adjusted for sex (males/females) and age (years). <sup>c</sup> Adjusted for sex (males/females), age (years) and BF% (normal/high). <sup>d</sup> Adjusted for sex (males/females), age (years), BF% (normal/high) and energy-adjusted dietary fiber intake (g/day). <sup>e</sup> Adjusted for sex (males/females), age (years), BF% (normal/high) and energy-adjusted SFAs intake (g/day). <sup>f</sup> Adjusted for sex (males/females), age (years), BF% (normal/high) and lipids (% energy). <sup>g</sup> Adjusted for sex (males/females), age (years), BF% (normal/high) and energy-adjusted MUFAs intake (g/day). <sup>h</sup> Adjusted for sex (males/females), age (years), waist circumference (normal/high). <sup>i</sup> Adjusted for sex (males/females), age (years), waist circumference (normal/high) and energy-adjusted dietary fiber intake (g/day). BF%, body fat percentage; SFAs, saturated fatty acids.

**Table S3.** Measures of quality and Hosmer–Lemeshow tests for logistic regression models of associations between categories of carbohydrate intake variables and elevated fasting insulin concentration ( $\geq 14.38 \mu\text{U/mL}$ ) in adolescents from Chiapas, Mexico.

| Factor variables                  | Elevated fasting insulin concentration ( $\geq 14.38 \mu\text{U/mL}$ ) |                      |                      |                      |
|-----------------------------------|------------------------------------------------------------------------|----------------------|----------------------|----------------------|
|                                   | OR (95% CI)                                                            | OR (95% CI)          | OR (95% CI)          | OR (95% CI)          |
| Total Carbohydrates <sup>ab</sup> | Model 1                                                                | Model 2 <sup>b</sup> | Model 3 <sup>c</sup> | Model 4 <sup>d</sup> |
| Sensitivity                       | 78.72%                                                                 | 65.96%               | 65.96%               | 70.21%               |
| Specificity                       | 36.47%                                                                 | 55.88%               | 63.53%               | 62.35%               |
| Hosmer–Lemeshow test p-value      | NA*                                                                    | 0.117                | 0.194                | 0.179                |
| Dietary Fiber <sup>a</sup>        | Model 1                                                                | Model 2 <sup>b</sup> | Model 3 <sup>c</sup> | Model 4 <sup>e</sup> |
| Sensitivity                       | 55.32%                                                                 | 70.21%               | 68.09%               | 72.34%               |
| Specificity                       | 72.35%                                                                 | 63.53%               | 66.47%               | 65.88%               |
| Hosmer–Lemeshow test p-value      | NA*                                                                    | 0.031                | 0.070                | 0.076                |
| Total Sugars <sup>a</sup>         | Model 1                                                                | Model 2 <sup>b</sup> | Model 3 <sup>c</sup> | Model 4 <sup>d</sup> |
| Sensitivity                       | 80.85%                                                                 | 68.09%               | 70.21%               | 70.21%               |
| Specificity                       | 37.06%                                                                 | 63.53%               | 62.94%               | 65.29%               |
| Hosmer–Lemeshow test p-value      | NA*                                                                    | 0.249                | 0.218                | 0.374                |
| Dietary GI                        | Model 1                                                                | Model 2 <sup>b</sup> | Model 3 <sup>f</sup> | Model 4 <sup>g</sup> |
| Sensitivity                       | 44.68%                                                                 | 65.96%               | 65.96%               | 70.21%               |
| Specificity                       | 70.00%                                                                 | 58.24%               | 64.12%               | 65.88%               |
| Hosmer–Lemeshow test p-value      | NA*                                                                    | 0.158                | 0.311                | 0.190                |
| Dietary GL <sup>a</sup>           | Model 1                                                                | Model 2 <sup>b</sup> | Model 3 <sup>f</sup> | Model 4 <sup>h</sup> |
| Sensitivity                       | 40.43%                                                                 | 65.96%               | 68.09%               | 72.34%               |
| Specificity                       | 68.24%                                                                 | 58.24%               | 65.88%               | 65.29%               |
| Hosmer–Lemeshow test p-value      | NA*                                                                    | 0.159                | 0.397                | 0.168                |

<sup>a</sup> Energy-adjusted using the residuals method. <sup>b</sup> Adjusted for sex (males/females) and age (years). <sup>c</sup> Adjusted for sex (males/females), age (years) and BMI (normal/overweight or obesity). <sup>d</sup> Adjusted for sex (males/females), age (years), BMI (normal/overweight or obesity) and energy-adjusted MUFAs intake (g/day). <sup>e</sup> Adjusted for sex (males/females), age (years), BMI (normal/overweight or obesity), energy-adjusted MUFAs intake (g/day) and total energy intake (kcal/day). <sup>f</sup> Adjusted for sex (males/females), age (years), Mother's language (Spanish/Indigenous) and BMI (normal/overweight or obesity). <sup>g</sup> Adjusted for sex (males/females), age (years), mother's language (Spanish/Indigenous), BMI (normal/overweight or obesity) and energy-adjusted dietary fiber intake (g/day). <sup>h</sup> Adjusted for sex (males/females), age (years), Mother's language (Spanish/Indigenous), energy-adjusted dietary fiber intake (g/day) and total energy intake (kcal/day). BMI, body mass index.
